# Supplementary material for: Semantic and cognitive tools to aid statistical science: replace confidence and significance by compatibility and surprise
Source: PubMed Central journal article supplement (PMC7528258; doi:10.1186/s12874-020-01105-9), 2020-09-30

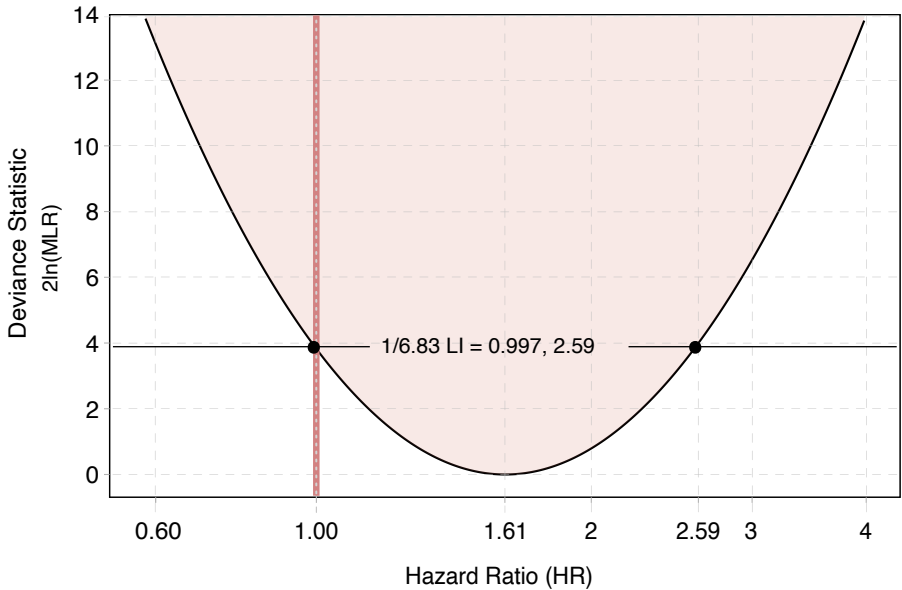

Supplement: 12874_2020_1105_MOESM4_ESM.pdf [file 12874_2020_1105_MOESM4_ESM.pdf]
